# Supplementary material
Source: publisher site journal article supplement (https://www.dovepress.com/article/568022)
Supplement: Supplementary file 1 [file Supplementary%20materials_3.pdf]

**Table S1. Composition and dosage of herbal ingredients in Yi-qi-hua-yu-jie-du decoction (YJD)**

| Scientific name*                                                            | Weight |
|-----------------------------------------------------------------------------|--------|
| <i>Astragalus mongholicus</i> Bunge                                         | 15g    |
| <i>Codonopsis pilosula</i> (Franch.) Nannf.                                 | 15g    |
| <i>Citrus × acida</i> Pers.                                                 | 6g     |
| <i>Pinellia tuberifera</i> Ten.                                             | 10g    |
| <i>Poria cocos</i>                                                          | 10g    |
| <i>Aucklandia costus</i> Falc.                                              | 6g     |
| <i>Wurfbainia uliginosa</i> (J.Koenig) Giseke                               | 3g     |
| <i>Atractylodes macrocephala</i> Koidz                                      | 10g    |
| <i>Paeonia lactiflora</i> Pall.                                             | 10g    |
| <i>Angelica sinensis</i> (Oliv.) Diels                                      | 10g    |
| <i>Sparganium stoloniferum</i> (Buch.-Ham. ex Graebn.)<br>Buch.-Ham. ex Juz | 10g    |
| <i>Curcuma aromatica</i> Salisb                                             | 10g    |
| <i>Salvia chinensis</i> Benth.                                              | 30g    |
| <i>Scleromitron angustifolium</i> (Cham. & Schltdl.)<br>Benth.              | 30g    |
| <i>Glycyrrhiza glabra</i> L.                                                | 5g     |

\* The name has been validated at [www.theplantlist.org](http://www.theplantlist.org).

**Table S2. The content of the marker compounds in YJD**

| Name                           | CAS No      | Content in YJD (ng·mg <sup>-1</sup> ) |
|--------------------------------|-------------|---------------------------------------|
| Astragaloside IV               | 84687-43-4  | 26.970                                |
| Calycosin-7-O-beta-D-glucoside | 20633-67-4  | 144.007                               |
| Lobetyolin                     | 136085-37-5 | 99.204                                |
| Atractylenolide III            | 73030-71-4  | 32.020                                |
| Paeoniflorin                   | 23180-57-6  | 2305.240                              |
| Ferulic acid                   | 1135-24-6   | 145.685                               |
| Succinic acid                  | 110-15-6    | 682.296                               |
| Hesperidin                     | 520-26-3    | 2239.183                              |
| Pachymic acid                  | 29070-92-6  | 6.024                                 |
| Dehydrocostus lactone          | 477-43-0    | 36.739                                |
| Rutin                          | 153-18-4    | 234.124                               |
| Curcumin                       | 458-37-7    | 50.275                                |
| Rosmarinic acid                | 20283-92-5  | 95.101                                |
| Salvianolic acid B             | 121521-90-2 | 496.713                               |
| p-Coumaric acid                | 501-98-4    | 334.314                               |
| Liquiritin                     | 551-15-5    | 486.248                               |

### **Method S1. Sample preparation and analysis method**

Standard reagents were purchased from Chengdu Must Biotechnology Co (China). Mixed standard working fluids (1–1000 ng/mL) were prepared. Freeze-dried YJD powder (20 mg) was weighed and dissolved in 10 mL double-distilled water. Then, 500  $\mu$ L of the above solution was diluted to 10 mL and the supernatant was collected for LC/MS analysis.

Chromatographic conditions: The Altis-002 (Thermo, USA) and ACE Excel 3 C18-AR column (ACE, UK) were applied to the liquid chromatography analysis. Mobile phase A was 2 mM ammonium formate, and mobile phase B was acetonitrile. The gradient elution program was as follows: 0–10 min 78% A + 22% B, 10–26 min 15% A + 85% B, 26–30 min 78% A + 22% B.

Mass spectrometry conditions: The flow rate of the sheath gas was 50.0 Arb, and that of the auxiliary gas was 10.0 Arb. The ion spray voltages were 3500 V and 2500 V for the positive and negative modes, respectively.

The concentration of each marker compound in YJD was determined based on the standard curve for each reagent and the signal intensity of the corresponding substance in YJD.

**Fig. S1 The secondary mass spectra of the marker compounds in the standard reagent and YJD.**

**Standard reagent**

**YJD**

**1. Astragaloside IV**

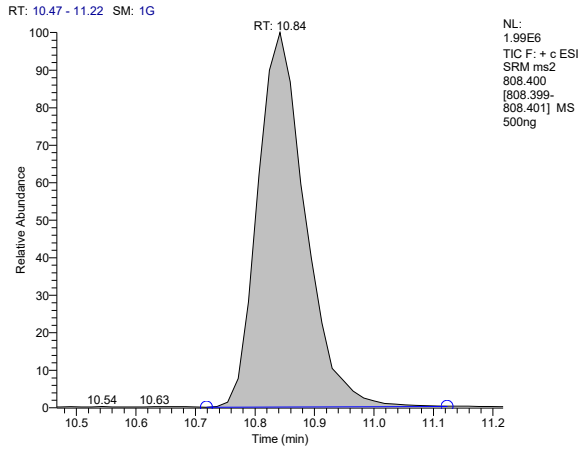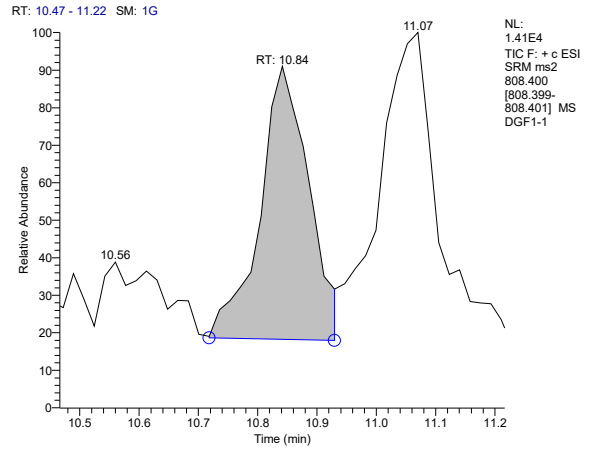

**2. Calycosin-7-O-beta-D-glucoside**

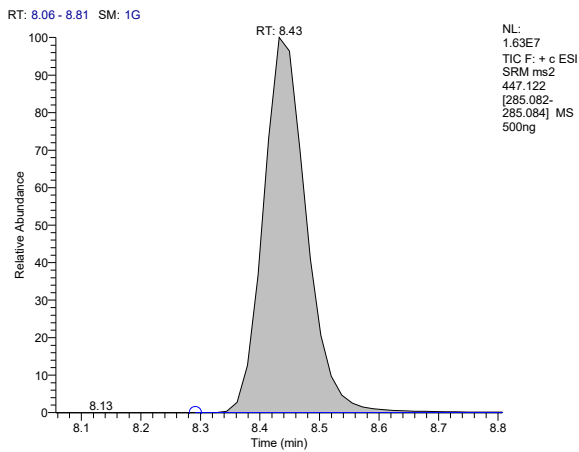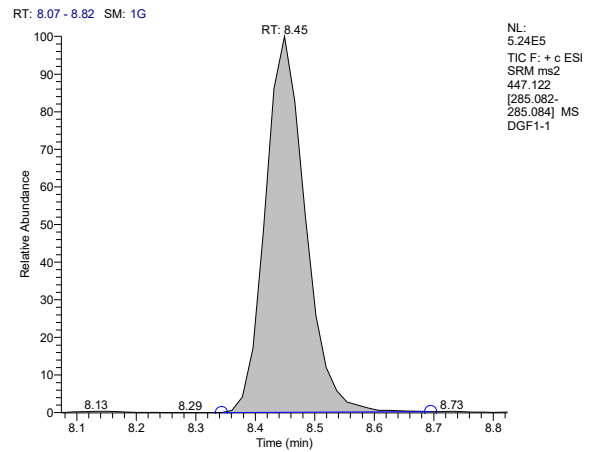

**3. Lobetyolin**

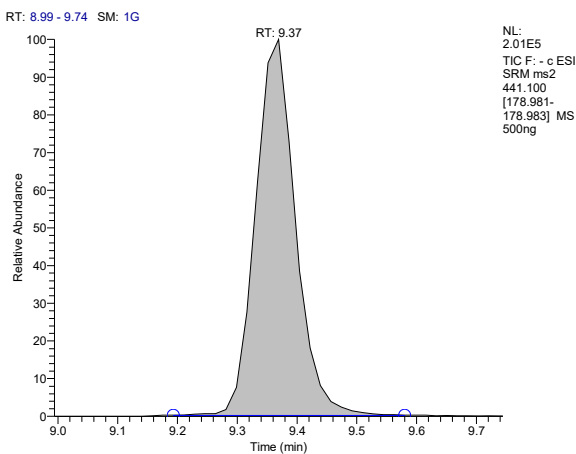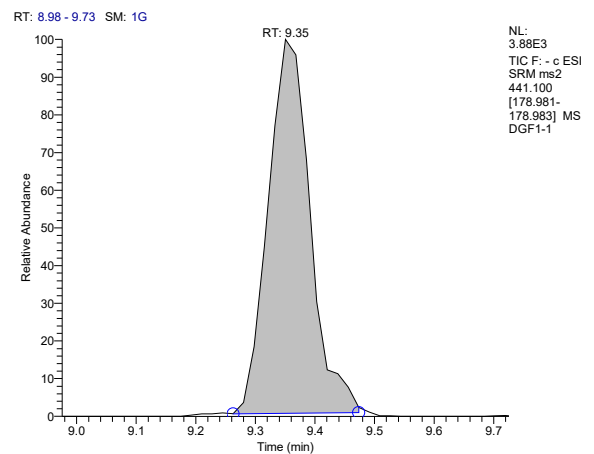

## 4. Atractylenolide III

RT: 13.38 - 14.13 SM: 1G

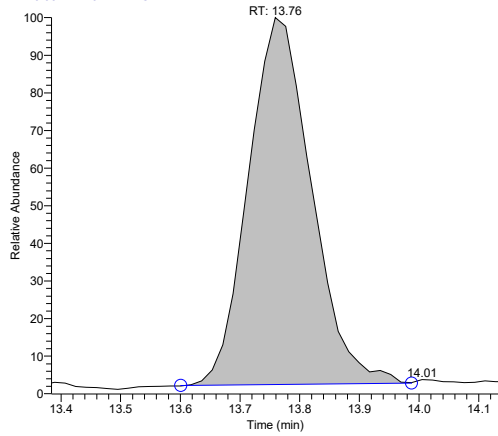

NL: 1.09E5  
TIC F: + c ESI  
SRM ms2 249.100  
[231.011-231.013] MS  
500ng

RT: 13.28 - 14.03 SM: 1G

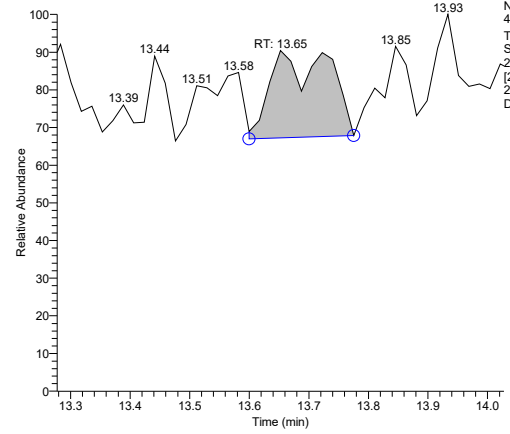

NL: 4.66E3  
TIC F: + c ESI  
SRM ms2 249.100  
[231.011-231.013] MS  
DGF1-1

## 5. Paeoniflorin

RT: 7.64 - 8.39 SM: 1G

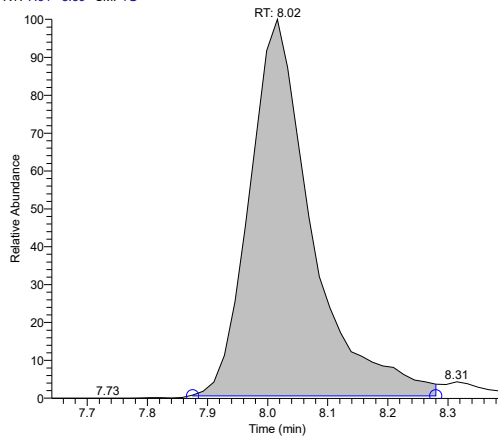

NL: 8.37E4  
TIC F: - c ESI  
SRM ms2 479.050  
[449.124-449.126] MS  
500ng

RT: 7.64 - 8.39 SM: 1G

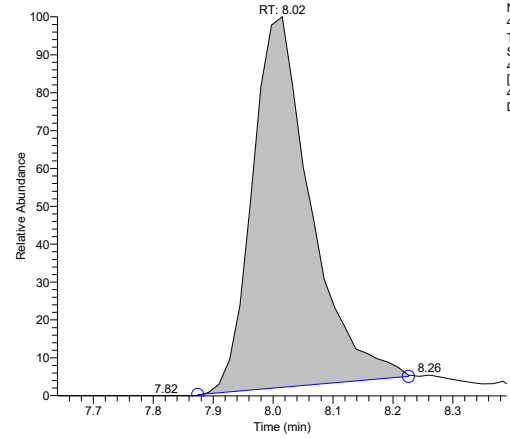

NL: 4.38E4  
TIC F: - c ESI  
SRM ms2 479.050  
[449.124-449.126] MS  
DGF1-1

## 6. Ferulic acid

RT: 3.28 - 4.03 SM: 3G

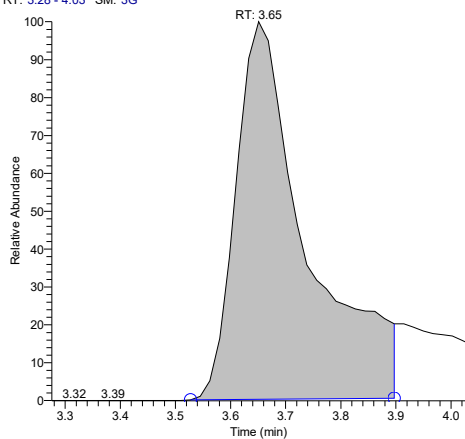

NL: 1.10E6  
Base Peak m/z= 133.48-134.48 F: - c  
ESI SRM ms2 192.950  
[133.987-133.989] MS  
500ng

RT: 3.28 - 4.03 SM: 3G

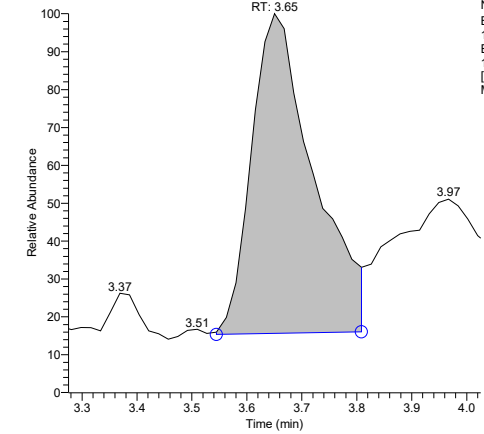

NL: 4.00E4  
Base Peak m/z= 133.48-134.48 F: - c  
ESI SRM ms2 192.950  
[133.987-133.989] MS  
DGF1-1

## 7. Succinic acid

RT: 2.43 - 3.18 SM: 3G

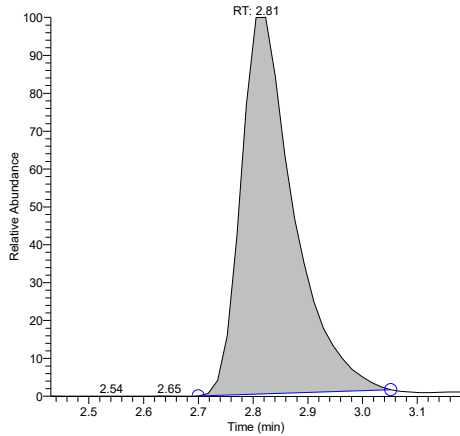

NL: 9.00E5  
Base Peak m/z=  
72.50-73.50 F: - c ESI  
SRM ms2 117.150  
[72.999-73.001] MS  
ICIS 500ng

RT: 2.41 - 3.16 SM: 3G

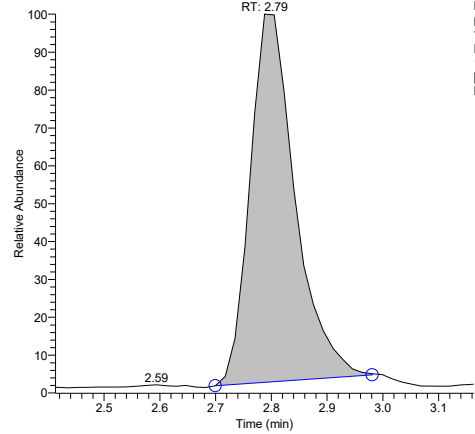

NL: 1.62E5  
Base Peak m/z=  
72.50-73.50 F: - c  
ESI SRM ms2  
117.150  
[72.999-73.001] MS  
DGF1-1

## 8. Hesperidin

RT: 8.63 - 9.38 SM: 1G

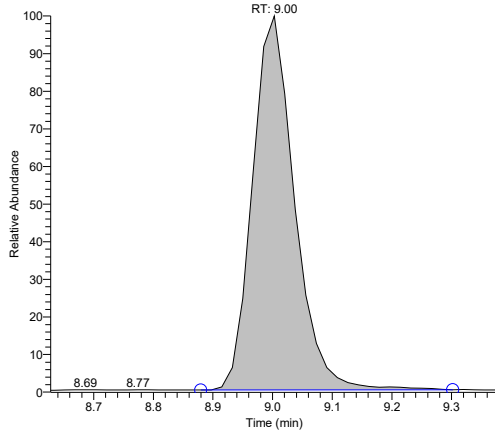

NL:  
2.72E6  
TIC F: - c ESI  
SRM ms2  
609.100  
[301.053-  
301.055] MS  
500ng

RT: 8.63 - 9.38 SM: 1G

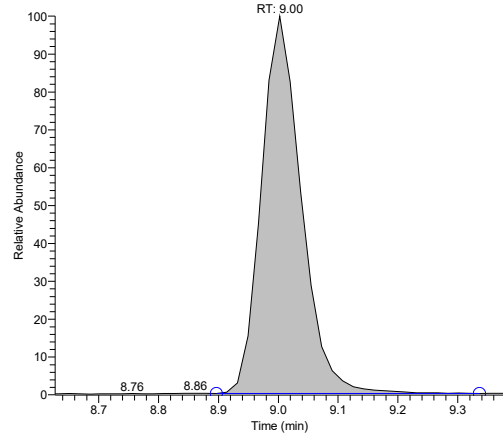

NL:  
1.42E6  
TIC F: - c ESI  
SRM ms2  
609.100  
[301.053-  
301.055] MS  
DGF1-1

## 9. Pachymic acid

RT: 16.43 - 17.18 SM: 1G

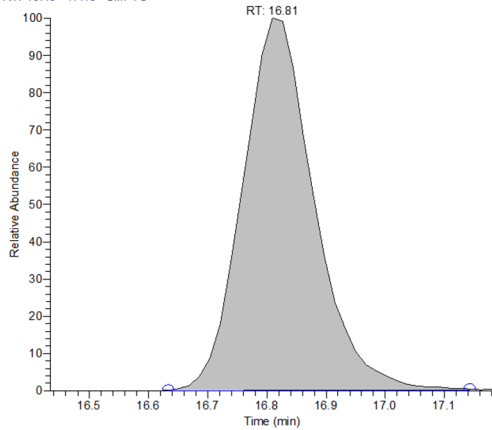

NL:  
5.44E5  
TIC F: - c ESI  
SRM ms2  
527.350  
[465.320-  
465.322] MS  
500ng

RT: 16.50 - 17.25 SM: 1G

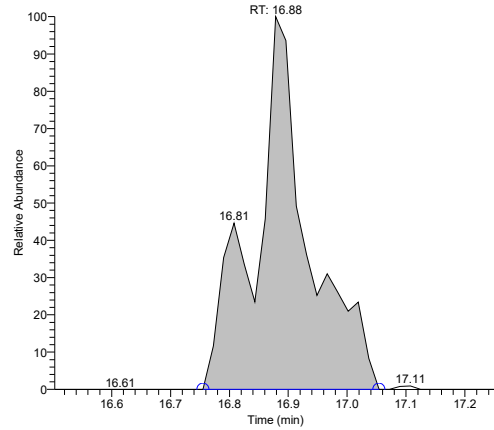

NL:  
5.44E2  
TIC F: - c ESI  
SRM ms2  
527.350  
[465.320-  
465.322] MS  
DGF1-1

## 10. Dehydrocostus lactone

RT: 15.23 - 15.98 SM: 1G

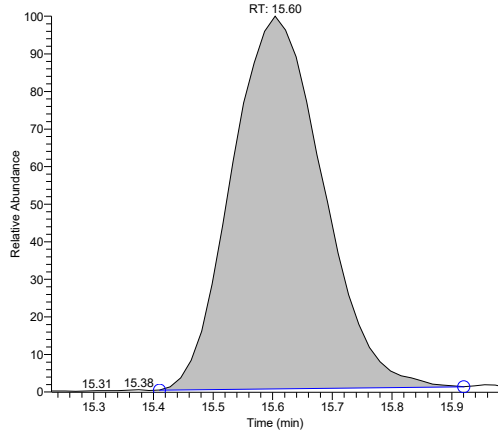

NL: 1.82E5  
TIC F: + c ESI  
SRM ms2  
231.100  
[185.154-  
185.156] MS  
500ng

RT: 15.19 - 15.94 SM: 1G

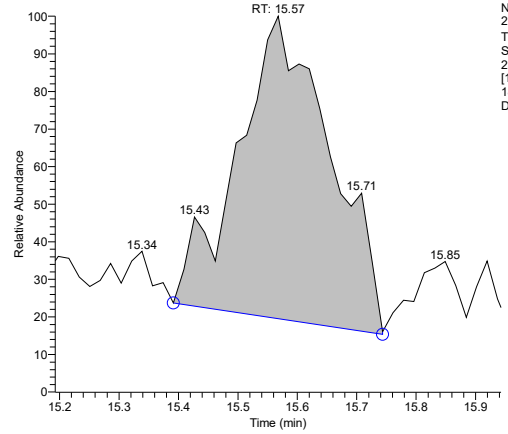

NL: 2.93E3  
TIC F: + c ESI  
SRM ms2  
231.100  
[185.154-  
185.156] MS  
DGF1-1

## 11. Rutin

RT: 7.38 - 8.13 SM: 1G

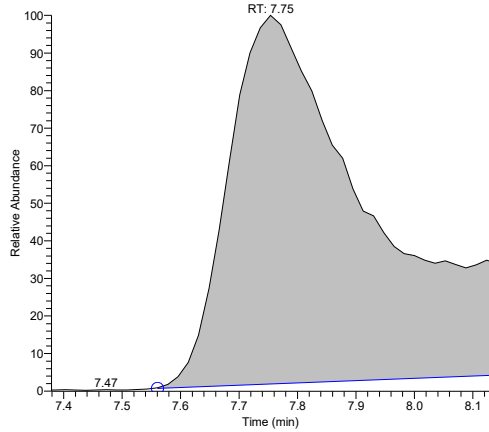

NL: 5.12E5  
TIC F: - c ESI  
SRM ms2  
609.100  
[299.999-  
300.001] MS  
ICIS 500ng

RT: 7.34 - 8.09 SM: 1G

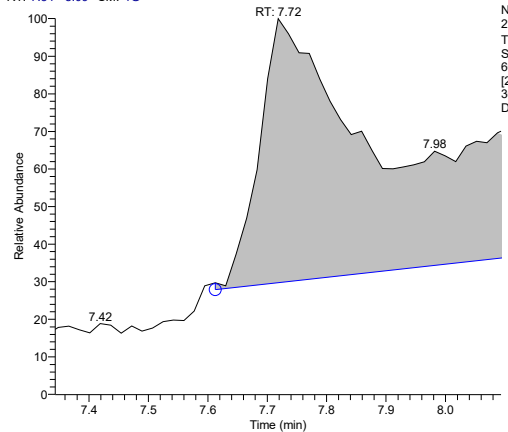

NL: 2.70E4  
TIC F: - c ESI  
SRM ms2  
609.100  
[299.999-  
300.001] MS  
DGF1-1

## 12. Curcumin

RT: 13.26 - 14.01 SM: 1G

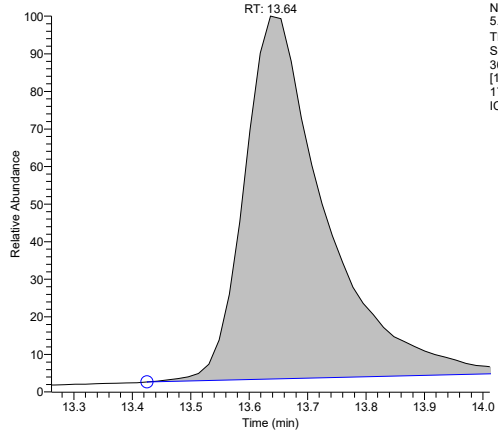

NL: 5.38E6  
TIC F: + c ESI  
SRM ms2  
369.050  
[176.999-  
177.001] MS  
ICIS 500ng

RT: 13.26 - 14.01 SM: 1G

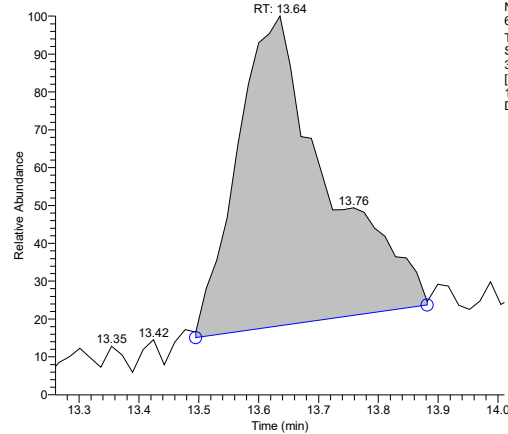

NL: 6.26E3  
TIC F: + c ESI  
SRM ms2  
369.050  
[176.999-  
177.001] MS  
DGF1-1

### 13. Rosmarinic acid

RT: 2.99 - 3.74 SM: 3G

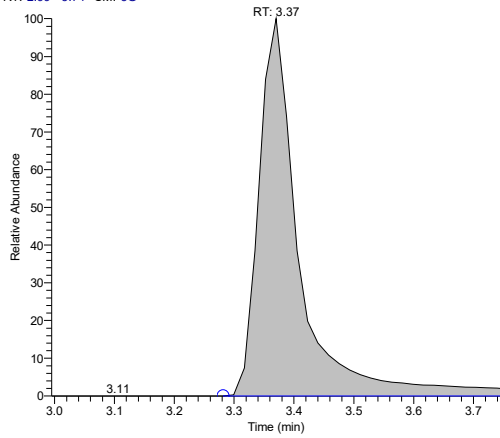

NL: 1.70E6  
TIC F: - c ESI  
SRM ms2  
359.000  
[161.070-161.072] MS  
500ng

RT: 2.99 - 3.74 SM: 3G

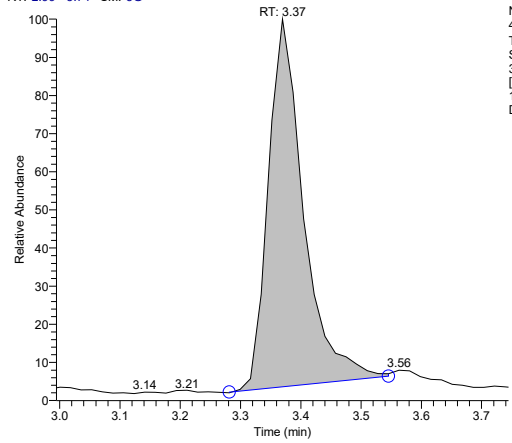

NL: 4.43E4  
TIC F: - c ESI  
SRM ms2  
359.000  
[161.070-161.072] MS  
DGF1-1

### 14. Salvianolic acid B

RT: 2.42 - 3.17 SM: 1G

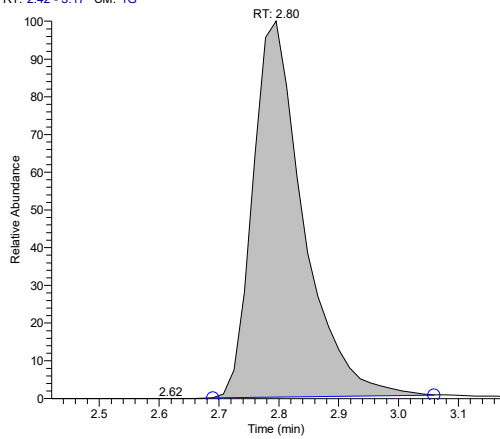

NL: 2.47E5  
TIC F: - c ESI  
SRM ms2  
717.113  
[519.064-519.066] MS  
500ng

RT: 2.40 - 3.15 SM: 1G

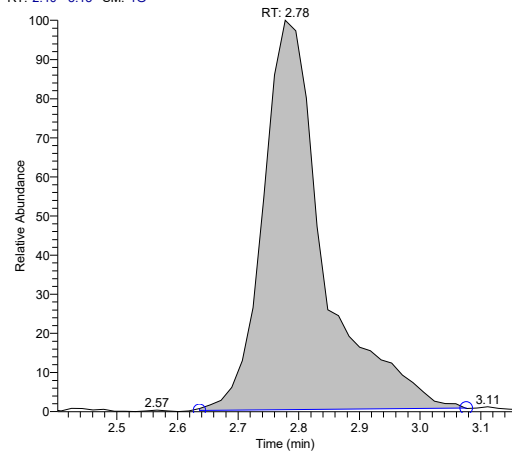

NL: 2.05E4  
TIC F: - c ESI  
SRM ms2  
717.113  
[519.064-519.066] MS  
ICIS DGF1-1

### 15. p-Coumaric acid

RT: 21.84 - 22.59 SM: 1G

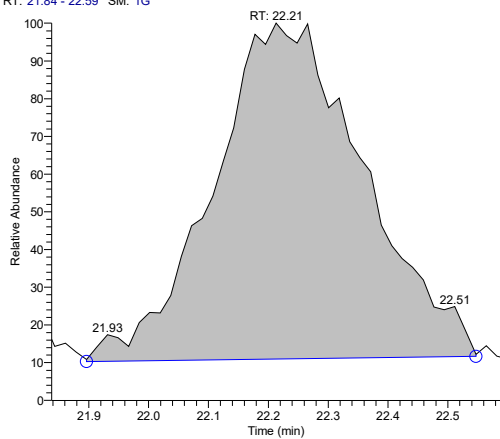

NL: 7.18E3  
TIC F: + c ESI  
SRM ms2  
163.000  
[107.053-107.055] MS  
500ng

RT: 21.17 - 21.92 SM: 1G

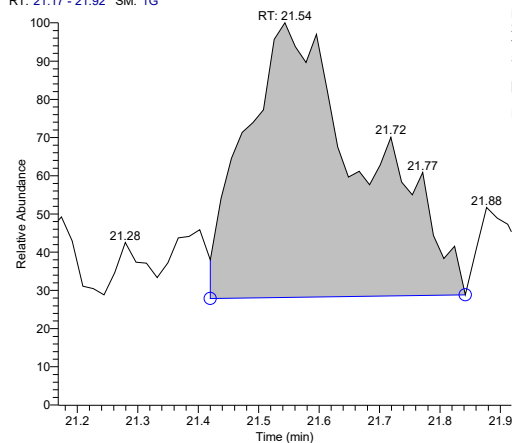

NL: 2.12E3  
TIC F: + c ESI  
SRM ms2  
163.000  
[107.053-107.055] MS  
DGF1-1

# 16. Liquiritin

RT: 8.18 - 8.93 SM: 1G

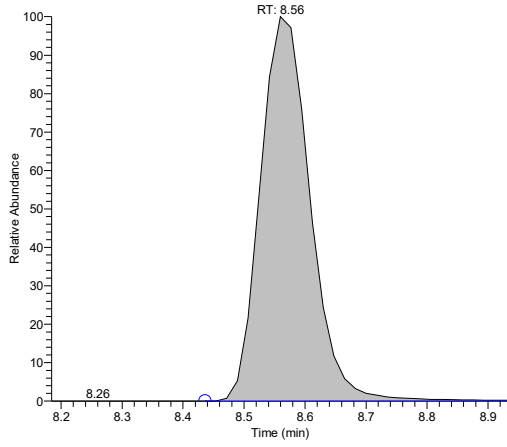

NL:  
1.54E7  
TIC F: - c ESI  
SRM ms2  
417.050  
[254.999-  
255.001] MS  
500ng

RT: 8.20 - 8.95 SM: 1G

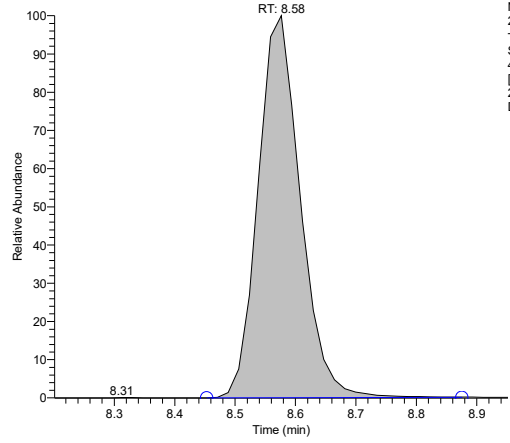

NL:  
2.17E6  
TIC F: - c ESI  
SRM ms2  
417.050  
[254.999-  
255.001] MS  
DGF1-1

**Table S3. The active ingredients of Yi-qi-hua-yu-jie-du decoction (YJD)**

| NO    | Proposed compound      | CAS        | PubChem<br>CID | Canonical SMILES                                                                                |
|-------|------------------------|------------|----------------|-------------------------------------------------------------------------------------------------|
| YJD1  | Quinic acid            | 77-95-2    | 6508           | <chem>C1C(C(C(CC1(C(=O)O)O)O)O)O</chem>                                                         |
| YJD2  | Tyrosine               | 60-18-4    | 6057           | <chem>C1=CC(=CC=C1CC(C(=O)O)N)O</chem>                                                          |
| YJD3  | Danshensu              | 76822-21-4 | 11600642       | <chem>C1=CC(=C(C=C1CC(C(=O)O)O)O)O</chem>                                                       |
| YJD4  | trans-caffeic acid     | 501-16-6   | 689043         | <chem>C1=CC(=C(C=C1C=CC(=O)O)O)O</chem>                                                         |
| YJD5  | Tryptophan             | 73-22-3    | 6305           | <chem>C1=CC=C2C(=C1)C(=CN2)CC(C(=O)O)N</chem>                                                   |
| YJD6  | Dihydrocaffeic acid    | 1078-61-1  | 348154         | <chem>C1=CC(=C(C=C1CCC(=O)O)O)O</chem>                                                          |
| YJD7  | Codonopsine            | 26989-20-8 | 442631         | <chem>CC1C(C(C(N1C)C2=CC(=C(C=C2)OC)OC)O)O</chem>                                               |
| YJD8  | cis-caffeic acid       | 4361-87-9  | 1549111        | <chem>C1=CC(=C(C=C1C=CC(=O)O)O)O</chem>                                                         |
| YJD9  | Ferulic acid           | 537-98-4   | 445858         | <chem>COC1=C(C=CC(=C1)C=CC(=O)O)O</chem>                                                        |
| YJD10 | Trans-Melilotoside     | 618-67-7   | 5280759        | <chem>C1=CC=C(C(=C1)C=CC(=O)O)OC2C(C(C(O2)CO)O)O</chem>                                         |
| YJD11 | Isofraxidin            | 486-21-5   | 5318565        | <chem>COC1=C(C(=C2C(=C1)C=CC(=O)O2)OC)O</chem>                                                  |
| YJD12 | 7-Hydroxycoumarin      | 93-35-6    | 5281426        | <chem>C1=CC(=CC2=C1C=CC(=O)O2)O</chem>                                                          |
| YJD13 | loliolide              | 5989/2/6   | 100332         | <chem>CC1(CC(CC2(C1=CC(=O)O2)C)O)C</chem>                                                       |
| YJD14 | Syringaldehyde         | 134-96-3   | 8655           | <chem>COC1=CC(=CC(=C1O)OC)C=O</chem>                                                            |
| YJD15 | paeoniflorin           | 23180-57-6 | 442534         | <chem>CC12CC3(C4CC1(C4(C(O2)O3)COC(=O)C5=CC=CC=C5)OC6C(C(C(O6)CO)O)O)O</chem>                   |
| YJD16 | Scopoletin             | 92-61-5    | 5280460        | <chem>COC1=C(C=C2C(=C1)C=CC(=O)O2)O</chem>                                                      |
| YJD17 | Germacrone-4,5-epoxide | 92691-35-5 | 11637239       | <chem>CC1=CCCC2(C(O2)CC(=C(C)C)C(=O)C1)C</chem>                                                 |
| YJD18 | Salvianolic acid J     | -          | 24177556       | <chem>C1=CC(=C(C=C1CC(C(=O)O)OC(=O)C=CC2=CC3=C(C=C2)OC(C(O3)C(=O)O)C4=CC(=C(C=C4)O)O)O)O</chem> |
| YJD19 | Zedoalactone A         | -          | 15226639       | <chem>CC1=C2CC3C(CCC3(C)O)C(CC2OC1=O)(C)O</chem>                                                |
| YJD20 | Liquiritigenin         | 578-86-9   | 114829         | <chem>C1C(OC2=C(C1=O)C=CC(=C2)O)C3=CC=C(C=C3)O</chem>                                           |
| YJD21 | camphoric acid         | 560-05-4   | 21491          | <chem>CC1(C(CCC1(C)C(=O)O)C(=O)O)C</chem>                                                       |
| YJD22 | Luteolin               | 491-70-3   | 5280445        | <chem>C1=CC(=C(C=C1C2=CC(=O)C3=C(C=C(C=C3O2)O)O)O)O</chem>                                      |
| YJD23 | Perlolyrine            | 29700-20-7 | 160179         | <chem>C1=CC=C2C(=C1)C3=C(N2)C(=NC=C3)C4=CC=C(O4)CO</chem>                                       |
| YJD24 | Acacetin               | 480-44-4   | 5280442        | <chem>COC1=CC=C(C=C1)C2=CC(=O)C3=C(C=C(C=C3O2)O)O</chem>                                        |

|       |                              |             |           |                                                                                                                        |
|-------|------------------------------|-------------|-----------|------------------------------------------------------------------------------------------------------------------------|
| YJD25 | kaempferol                   | 520-18-3    | 5280863   | <chem>C1=CC(=CC=C1C2=C(C(=O)C3=C(C=C(C=C3O2)O)O)O</chem>                                                               |
| YJD26 | Liquiritin                   | 551-15-5    | 503737    | <chem>C1C(OC2=C(C1=O)C=CC(=C2)O)C3=CC=C(C=C3)OC4C(C(C(C(O4)CO)O)O)O</chem>                                             |
| YJD27 | Hesperetin                   | 520-33-2    | 72281     | <chem>COC1=C(C=C(C=C1)C2CC(=O)C3=C(C=C(C=C3O2)O)O)O</chem>                                                             |
| YJD28 | Methylnissolin-3-O-glucoside | 94367-42-7  | 101679160 | <chem>COC1=C(C2=C(C=C1)C3COC4=C(C3O2)C=CC(=C4)OC5C(C(C(C(O5)CO)O)O)O)OC</chem>                                         |
| YJD29 | pratensein                   | 2284-31-3   | 5281803   | <chem>COC1=C(C=C(C=C1)C2=COC3=CC(=CC(=C3C2=O)O)O)O</chem>                                                              |
| YJD30 | Isoliquiritigenin            | 961-29-5    | 638278    | <chem>C1=CC(=CC=C1C=CC(=O)C2=C(C=C(C=C2)O)O)O</chem>                                                                   |
| YJD31 | Calycosin                    | 20575-57-9  | 5280448   | <chem>COC1=C(C=C(C=C1)C2=COC3=C(C2=O)C=CC(=C3)O)O</chem>                                                               |
| YJD32 | Poncirin                     | 14941-08-3  | 442456    | <chem>CC1C(C(C(C(O1)OC2C(C(C(OC2OC3=CC(=C4C(=O)CC(OC4=C3)C5=CC=C(C=C5)OC)O)CO)O)O)O)O)O</chem>                         |
| YJD33 | Biochanin A                  | 491-80-5    | 5280373   | <chem>COC1=CC=C(C=C1)C2=COC3=CC(=CC(=C3C2=O)O)O</chem>                                                                 |
| YJD34 | Sinensetin                   | 2306-27-6   | 145659    | <chem>COC1=C(C=C(C=C1)C2=CC(=O)C3=C(C(=C(C=C3O2)OC)OC)OC)OC</chem>                                                     |
| YJD35 | Alizarin                     | 72-48-0     | 6293      | <chem>C1=CC=C2C(=C1)C(=O)C3=C(C2=O)C(=C(C=C3)O)O</chem>                                                                |
| YJD36 | Curcumenone                  | 100347-96-4 | 153845    | <chem>CC(=C1CC2C(C2(CC1=O)C)CCC(=O)C)C</chem>                                                                          |
| YJD37 | asiatic acid                 | 464-92-6    | 119034    | <chem>CC1CCC2(CCC3(C(=CCC4C3(CCC5C4(CC(C(C5(C)C(O)O)O)C)C)C2C1C)C)C(=O)O</chem>                                        |
| YJD38 | formononetin                 | 485-72-3    | 5280378   | <chem>COC1=CC=C(C=C1)C2=COC3=C(C2=O)C=CC(=C3)O</chem>                                                                  |
| YJD39 | Nobiletin                    | 478-01-3    | 72344     | <chem>COC1=C(C=C(C=C1)C2=CC(=O)C3=C(O2)C(=C(C(=C3OC)OC)OC)OC)OC</chem>                                                 |
| YJD40 | Astragaloside III            | 84687-42-3  | 441905    | <chem>CC1(C(CCC23C1C(CC4C2(C3)CCC5(C4(CC(C5C6(CC(C(O6)C(C)C)O)C)O)C)O)OC7C(C(C(CO7)O)O)OC8C(C(C(C(O8)CO)O)O)O)C</chem> |
| YJD41 | Atractylenolide II           | 73069-14-4  | 14448070  | <chem>CC1=C2CC3C(=C)CCCC3(CC2OC1=O)C</chem>                                                                            |

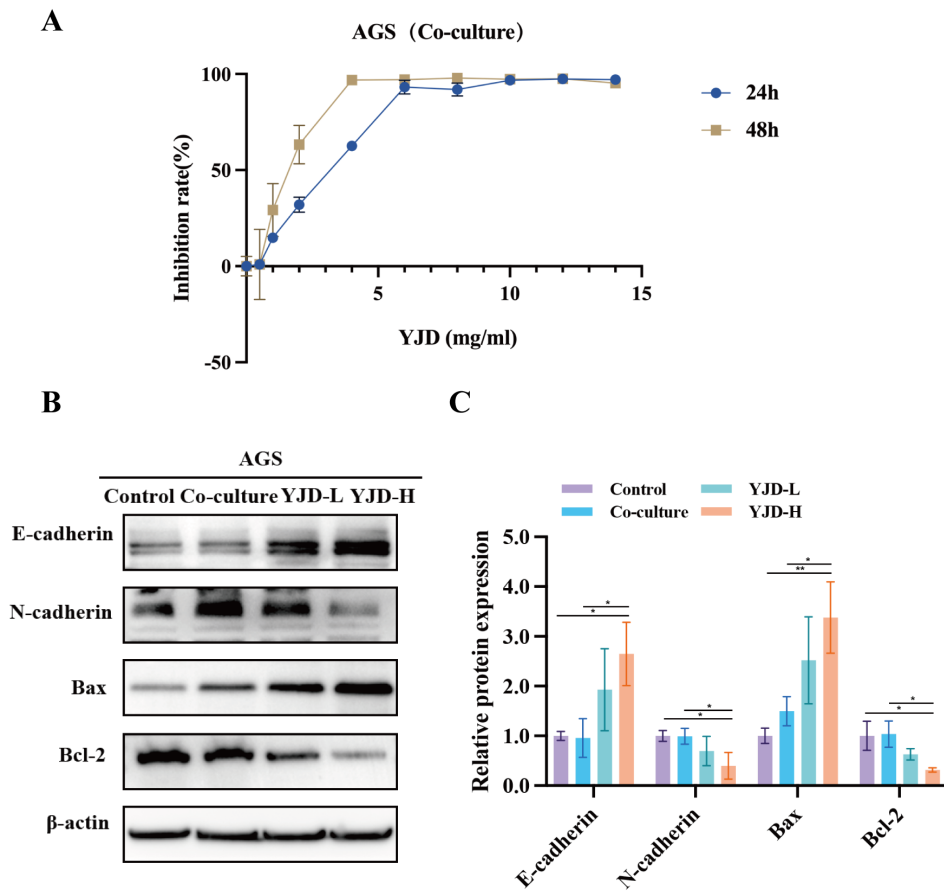

**Fig. S2** YJD suppresses AGS cell proliferation and induces apoptosis via TAM modulation in vitro.

(A) Viability of AGS cells exposed to conditioned medium from YJD-treated macrophages. (B) Western blotting analysis of E-cadherin, N-cadherin, Bax, and Bcl-2 in AGS cells. Data are presented as means  $\pm$  SD ( $n = 3$  independent experiments). \* $P < 0.05$ , \*\* $P < 0.01$ , \*\*\* $P < 0.001$ .

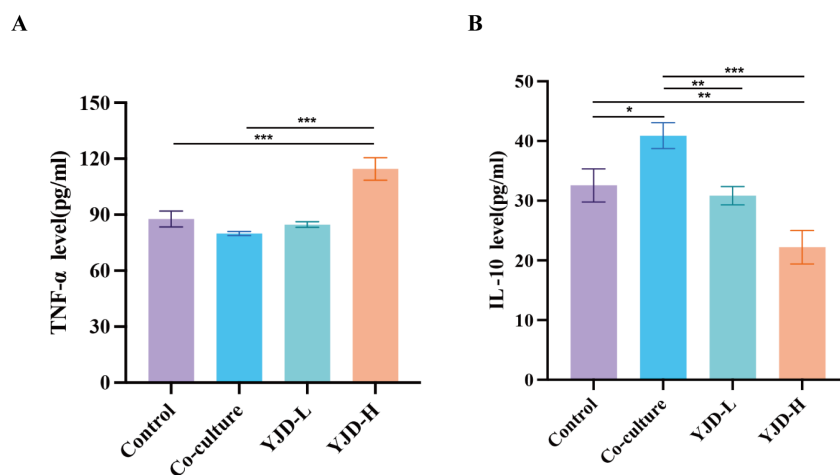

**Fig. S3** Effect of YJD on TNF- $\alpha$  and IL-10 secretion by TAMs in MKN-45 co-culture systems. (A) TNF- $\alpha$  levels in the supernatant of TAMs. (B) IL-10 levels in the supernatant of TAMs. Data are expressed as mean  $\pm$  SD ( $n = 3$  independent experiments). \* $P < 0.05$ , \*\* $P < 0.01$ , \*\*\* $P < 0.001$ .
